# Supplementary figures and images for: An FGF timer for zygotic genome activation
Source: PubMed Central journal article supplement — Genes Dev. 2023 Feb 1;37(3-4):80–5. doi: 10.1101/gad.350164.122 (PMC10069452; doi:10.1101/gad.350164.122), 2023-02-01

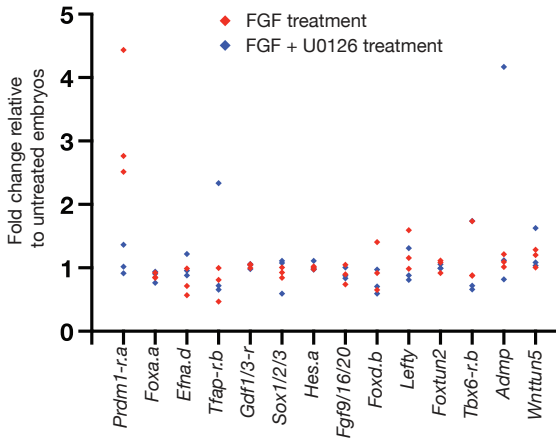

Figure S1

Supplement: supp_gad.350164.122_SupplementFigS1.pdf [file supp_gad.350164.122_SupplementFigS1.pdf]

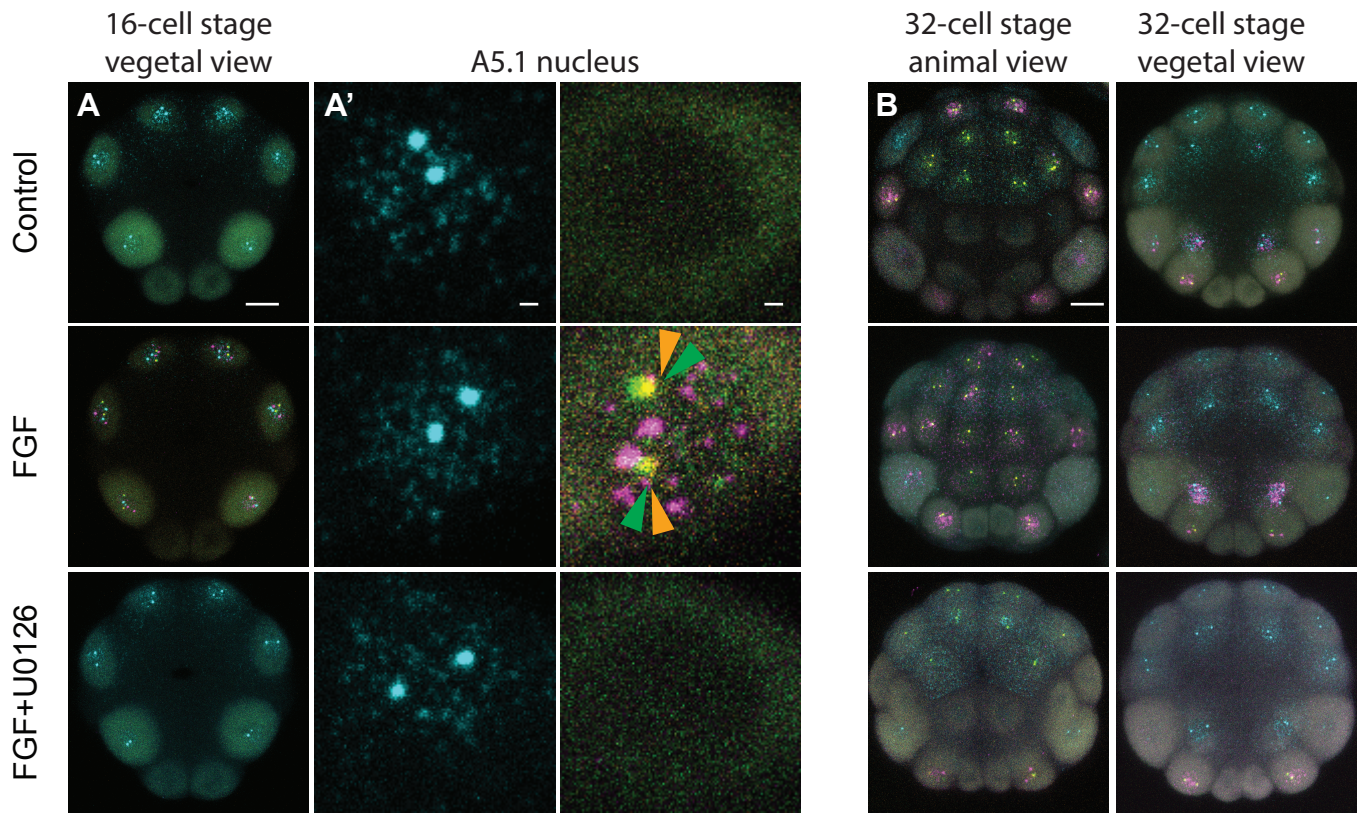

*Foxa.a* *Prdm1-r.a* *Prdm1-r.b* *Otx*

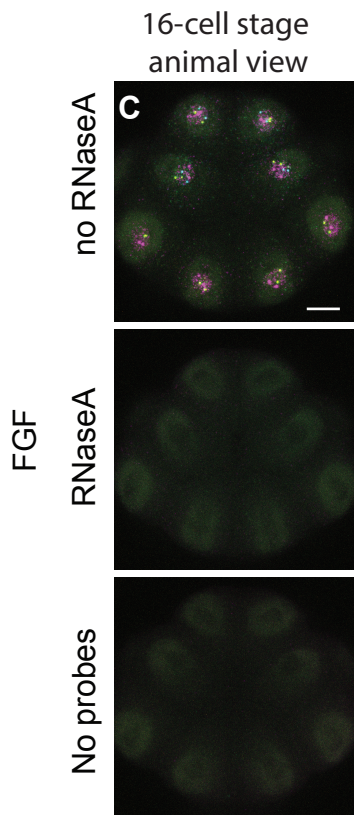

Figure S2

Supplement: supp_gad.350164.122_SupplementFigS2.pdf [file supp_gad.350164.122_SupplementFigS2.pdf]

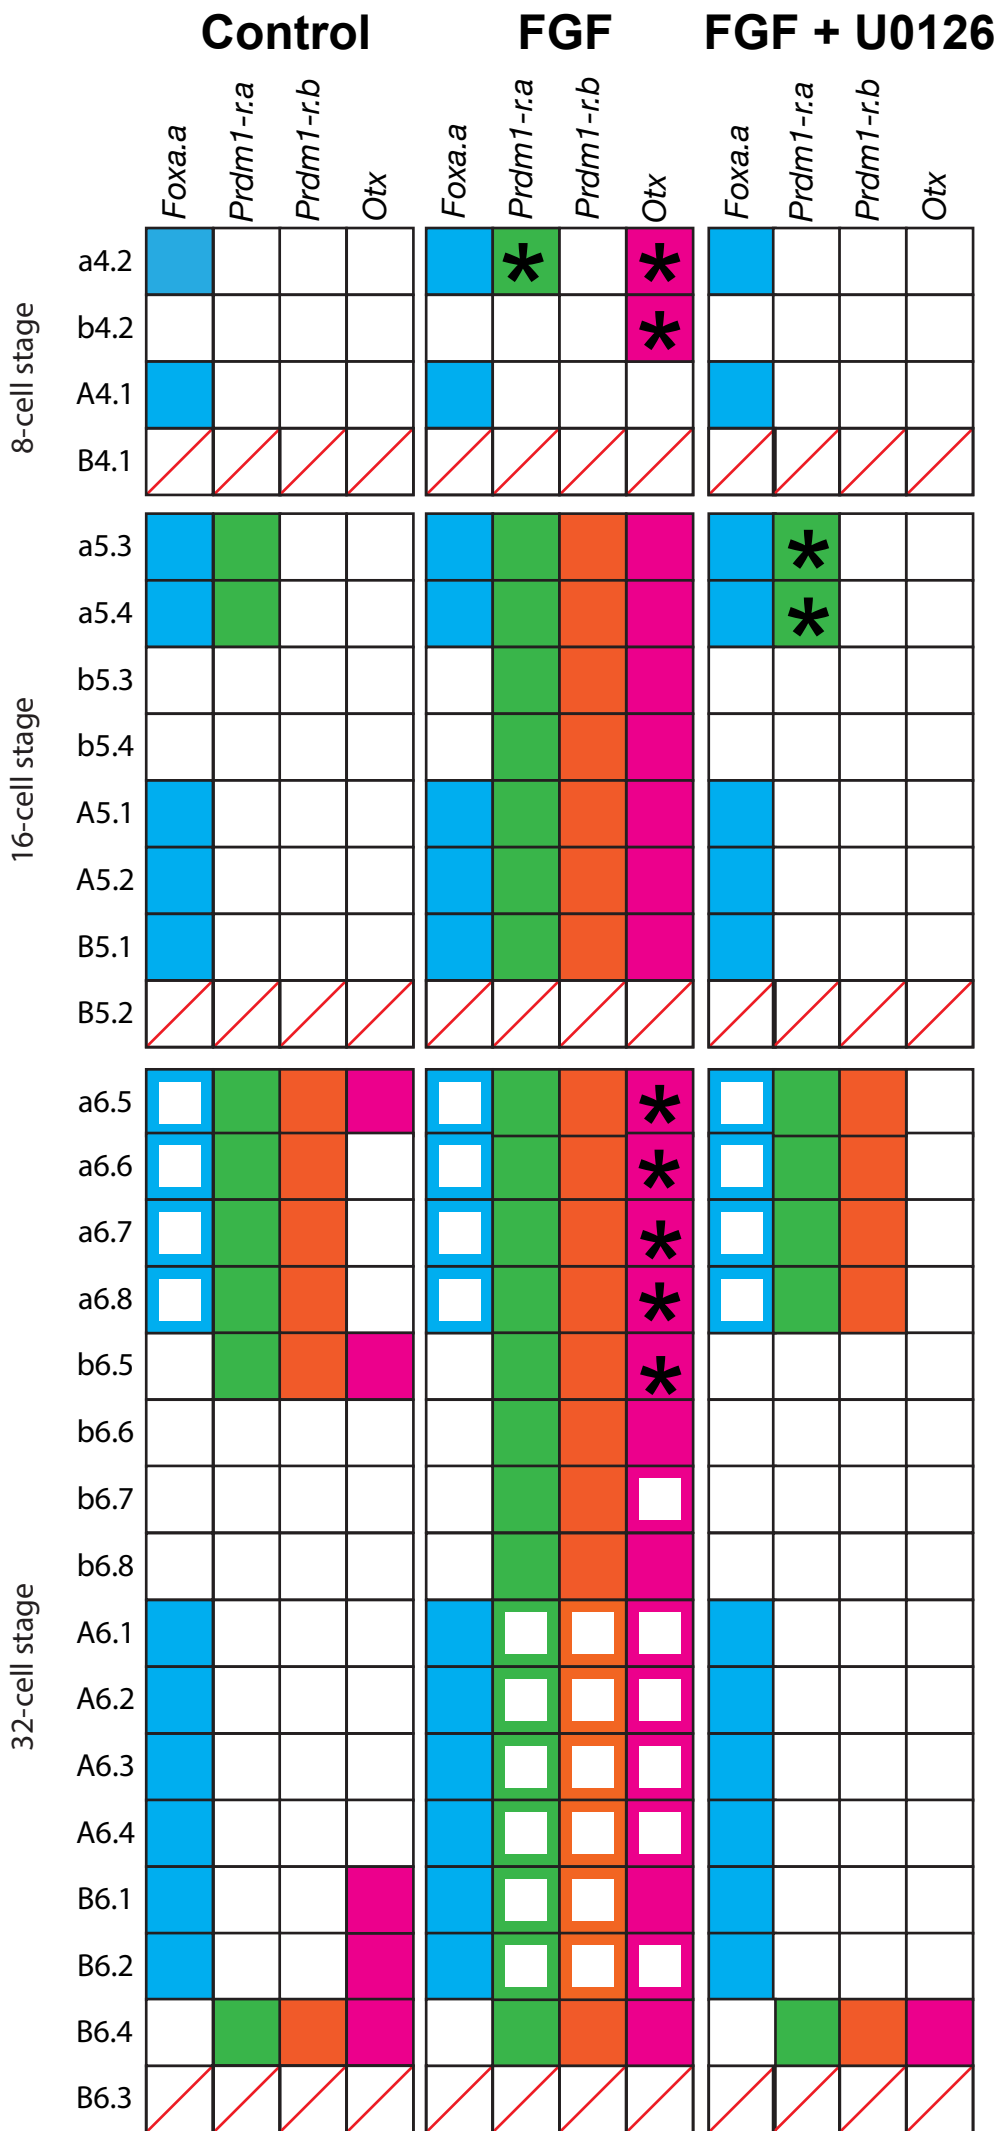

Figure S2

Supplement: supp_gad.350164.122_SupplementFigS3.pdf [file supp_gad.350164.122_SupplementFigS3.pdf]

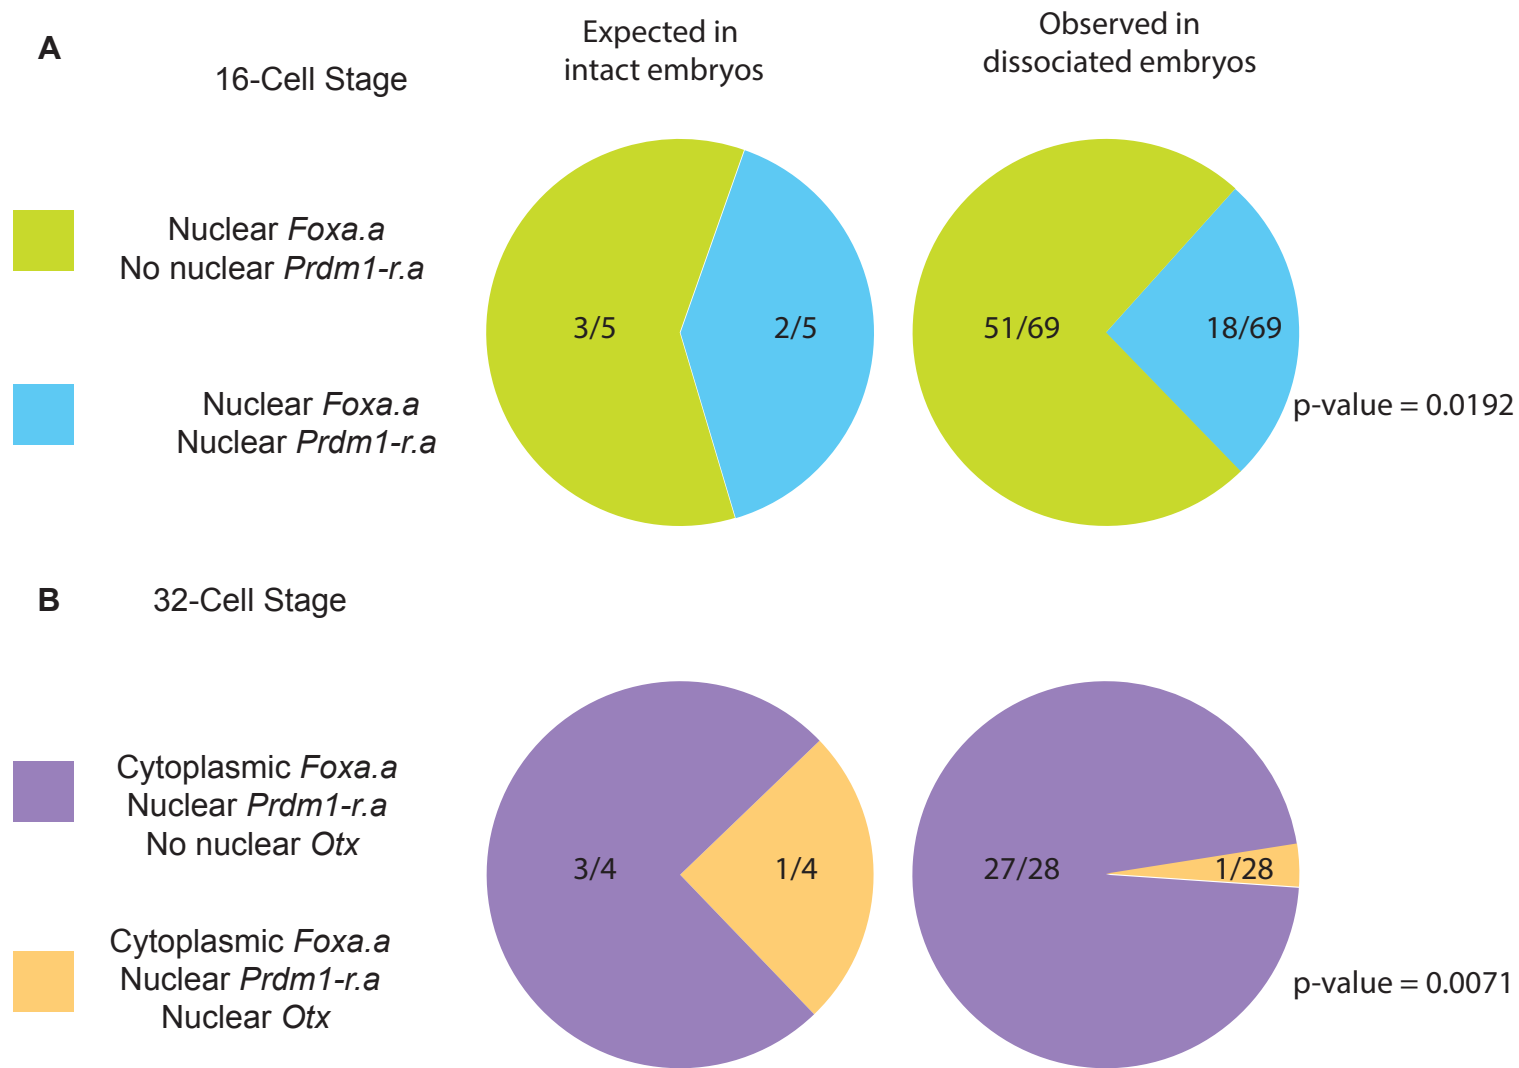

Figure S4

Supplement: supp_gad.350164.122_SupplementFigS4.pdf [file supp_gad.350164.122_SupplementFigS4.pdf]

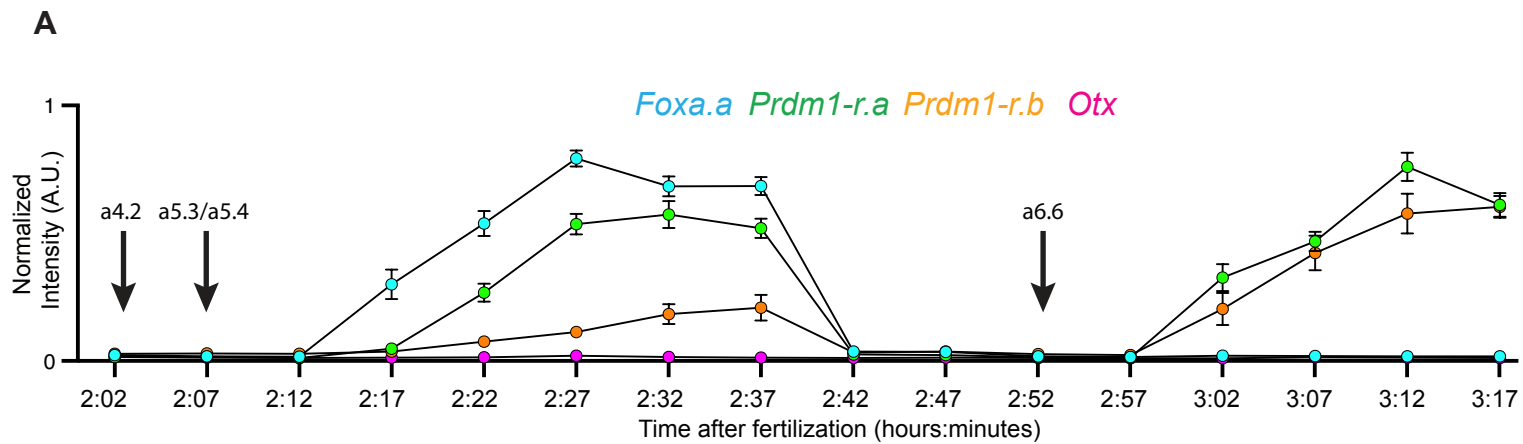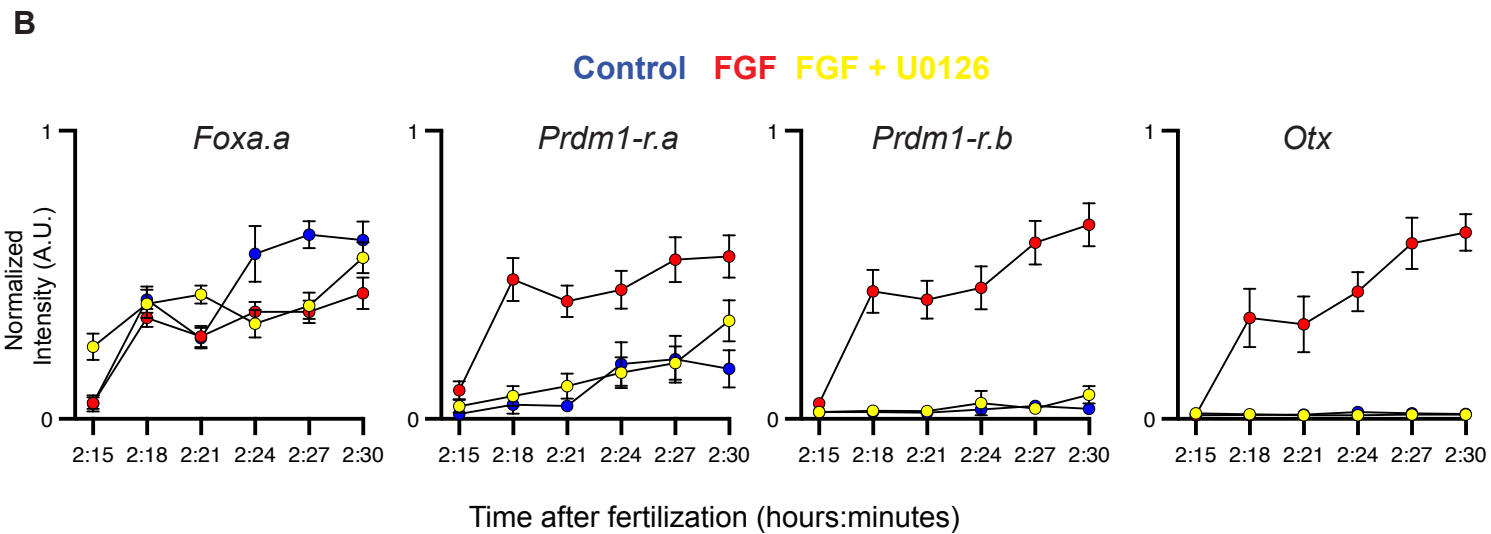

Figure S5

Supplement: supp_gad.350164.122_SupplementFigS5.pdf [file supp_gad.350164.122_SupplementFigS5.pdf]
